# Supplementary material
Source: Springer Nature journal article supplement (https://www.springerprofessional.de/resource/supplementary/13638_2014_1022_MOESM2_ESM.pdf/11899068)

## Transformer Loading

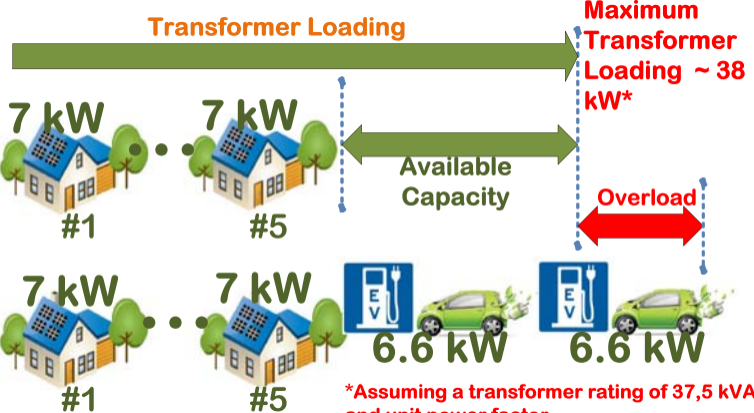

\*Assuming a transformer rating of 37,5 kVA and unit power factor.

Supplement: MOESM2 [file 11899068]
